# Supplementary material
Source: PubMed Central journal article supplement (PMC1913740)
Supplement: plntcell_tpc.106.047621_1.pdf [file plntcell_tpc.106.047621_1.pdf]

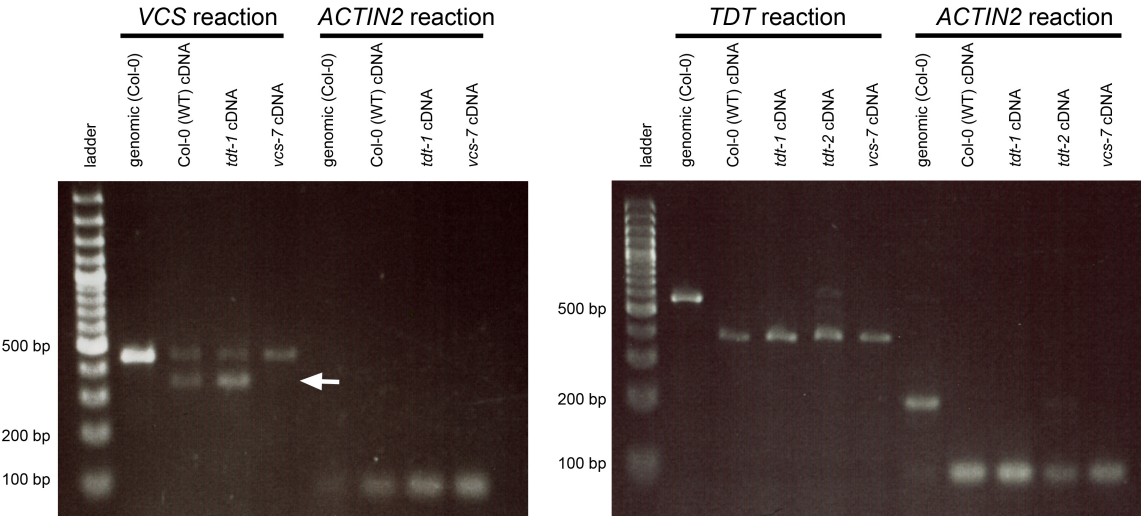

### Supplemental Figure 1. *vcs-7* is an RNA null allele.

RT-PCR tests for RNA specific for *VCS* and *TDT* and *ACTIN2*. Amplification of *VCS* and *TDT* used primers anchored on different exons to allow for easy distinction between genomic DNA and cDNA amplification. We found no *VCS* RNA band in *vcs-7* (white arrow), and similar levels of *VCS* cDNA in Col-0 and *tdt-1*. Similar levels of *ACTIN2* and *TDT*-specific products were found in all samples.
