# Supplementary material
Source: PubMed Central journal article supplement (PMC1913740)
Supplement: plntcell_tpc.106.047621_2.pdf [file plntcell_tpc.106.047621_2.pdf]

## wild type (Columbia)

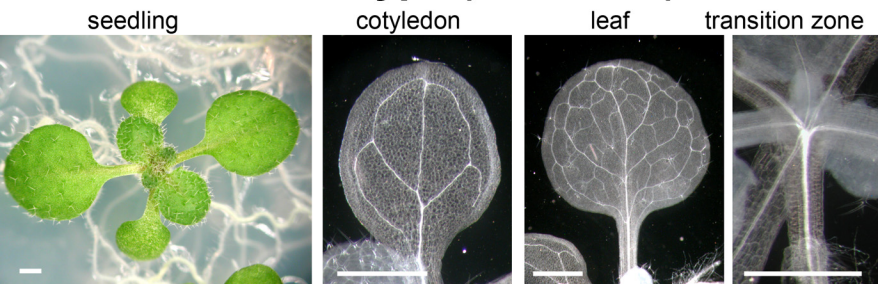

## *trident (tdt)*

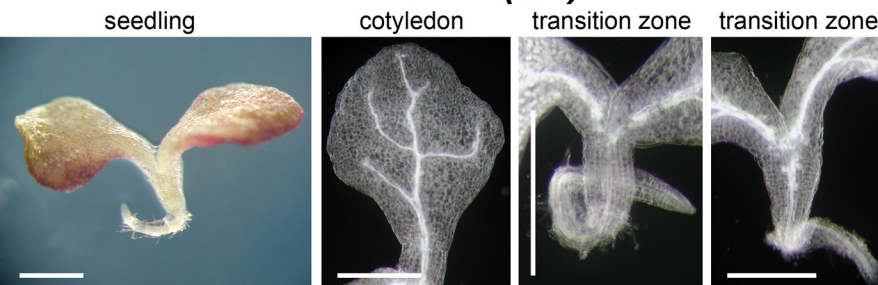

## *varicose-7 (vcs-7)*

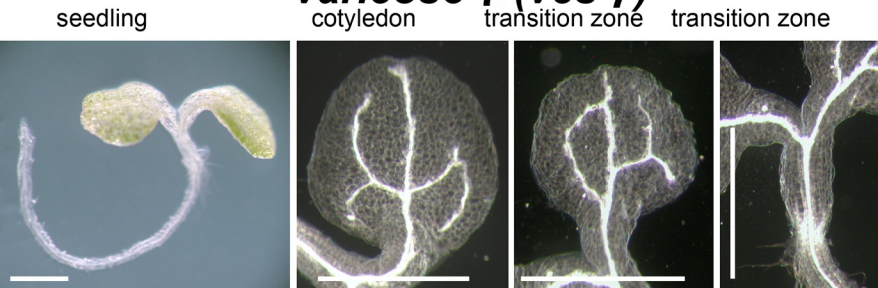

## *varicose-1 (vcs-1)*

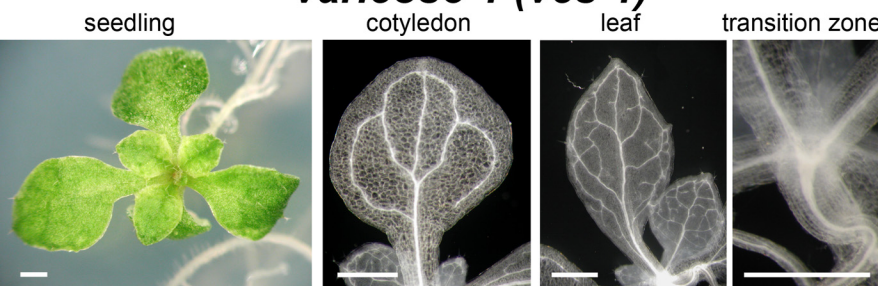

**Supplementary Figure 2.** Phenotypes of *vcs-1*, *vcs-7*, and *tdt-1*. This figure shows 11-day, 22°C grown seedlings. In contrast to the four-day seedlings shown in Figure 1, here you can see the *vcs-1* leaf, and its vein patterning defects. Under these growth conditions, neither *tdt-1* nor *vcs-7* produced leaf primordia. Bars = 1 mm.
