# Supplementary material
Source: PubMed Central journal article supplement (PMC1913740)
Supplement: plntcell_tpc.106.047621_3.pdf [file plntcell_tpc.106.047621_3.pdf]

1 LeMPK2 -----MDGSA**PQ**-**LDI**WMSD**PAAG**-**Q**PAMP**PL**PAAGM**ENT** **PATL**SHGG**R**F**I**Q**N**I**F**GN**I**FE**V**L--AK**VP** **PLP**  
2 NtNTF4 -----MDG**PA**H**Q**-**LDI**WMSD**PAAG**-**Q**PAP**PSQ**PAAGID**N** **PATL**SHGG**R**F**I**Q**N**I**F**GN**I**FE**V**L--AK**VP** **PLP**  
3 LeMPK1 -----MDG**SV**P**Q**-**LDI**WMSD**VAA**PA**Q**PP**PSQ**PAAGMD**N** **PATL**SHGG**R**F**I**Q**N**I**F**GN**I**FE**V**L--AK**VP** **PLP**  
4 NtSLPK -----MDG**S**Q**Q**-**SDI**WMSD**GA**L-**Q**PP**PAQ**PAAGMD**N** **PATL**SHGG**R**F**I**Q**N**I**F**GN**I**FE**V**L--AK**VP** **PLP**  
5 AtMPK6 -----MDG**SS**Q**Q**PAAD**ET**EA**PGG**-**F**PAAP**SPQ**PAAG**I**EN**I** **PATL**SHGG**R**F**I**Q**N**I**F**GN**I**FE**V**L--AK**VP** **PLP**  
6 LeMPK3 -----**VD**DANMG**AA**-**Q**PPD**EP**K**I**V**TA**Q**Y**VQ**LD**I**F**GN**I**FE**V**L--AK**VP** **PLP**  
7 NtWIPK -----**MD**DANMG**AGG**-**Q**PPD**EP**RS**VL**TH**GG**Y**VQ**LD**I**F**GN**I**FE**V**L**--AK**VP** **PLP**  
8 AtMPK3 -----**NT**GG**G**-**Q**Y**TD**PA**VE**TH**GG**F**I**S**LD**I**F**GS**L**FE**I**T--SK**VP** **PLP**  
9 AtMPK10 -----**ME**P**ND**AE**LI**E**I**Q**GE****Y**IA**WP**-**SS**Q**I**K**TT**I**D** **PG**TL**SH**GR**Y**I**Q**N**I**F**GH**I**EL**L--AK**VP** **PLP**  
10 LeMPK6 -----**SL**DS**SS**-**AD**GG**HS**N**I**RG**VP**TH**GR**V**Q**LV**H**GS**L**FE**V**S--**R**K**VP** **PLP**  
11 LeMPK5 -----  
12 AtMPK4 -----**SA**FS**CF**-**GS**S**Q**D**Q**SS**SK**G**VA**TH**GG**S**VQ**LV**N**V**GN**L**FE**V**S**--**R**K**VP** **PLP**  
13 AtMPK12 -----**MS**GS**SS**-**GS**-**TE**HC**I**K**V**P**TH**GG**R**V**Q**LV**N**V**GN**L**FE**V**S**--**R**K**VP** **PLP**  
14 LeMPK7 -----**MA**N**Q**T**GG**-**AS**S**I**GS**RD**RG**VL**IN**GG**Y**R**N**V**GN**L**FE**V**--**S**K**VP** **PLP**  
15 AtMPK5 -----**MA**KE**I**S--**AI**DL**GD**IN**I**K**GV**L**V**H**GG**R**FQ**N**V**GN**L**FE**V**S--**N**K**VP** **PLP**  
16 AtMPK11 -----**AS**IE**K**--**PF**GD**DS**NR**GV**S**IN**GG**R**V**Q**LV**N**V**GN**L**FE**V**S**--**K**V**VP** **PLP**  
17 LeMPK4 -----**MD**AE**NI**E--**NS**--**VE**IK**GI**P**TD**GR**Y**VE**N**V**GN**L**FE**V**L**--**S**K**VP** **PLP**  
18 NtNTF6 -----**ME**NE**IT**NE--**K**--**LE**K**GI**P**TH**GR**Y**VE**N**V**GN**L**FE**V**L**--**S**K**VP** **PLP**  
19 AtMPK13 -----**ME**K**R**--**ED**GG**IL**Y**D**GR**Y**VM**N**VL**GN**L**FE**L**S**--**S**K**Y**I**P** **PLP**  
20 AtMPK1 -----**MA**TL**VP****P**--**NG**I**R**NE**Q**K**Y**--**FS**M**Q**TL**FE**I**D**--**T**K**VP**--**K**P  
21 AtMPK2 -----**MA**TP**VP****P**--**NG**I**R**NO**Q**K**Y**--**FS**M**Q**TL**FE**I**D**--**T**K**VP**--**K**P  
22 LeMPK9 -----**MA**TP**VE****P**--**NG**I**R**S**Q**E**K**Y--**YS**M**Q**SL**FE**I**D**--**T**K**VP**--**K**P  
23 AtMPK7 -----**MA**ML**VE****P**--**NG**I**K**Q**Q**E**K**Y--**YS**M**Q**TL**FE**I**D**--**T**K**VP**--**K**P  
24 AtMPK14 -----**MA**ML**VP****P**--**NG**I**R**O**E**E**K**Y--**Y**TM**Q**TL**FE**I**D**--**T**K**VP**--**K**P  
25 LeMPK8 -----**MA**TV**VA**--**NG**I**R**S**R**E**K**Y--**Y**TM**Q**TL**FE**I**D**--**T**K**VP**--**K**P  
26 HeERK1 -----**MA**AAAA**Q**--**GG**GG**GE**P**R**TE**GV**GP**V**GE**VE**W**K**Q**Q****P****D**V**G**--**P**R**Y**T**Q**--**LD**Y  
27 LeMPK14 -----  
28 LeMPK15\* -----  
29 LeMPK16 -----**MG**SS**TF**VD**GV**L**RF**F**H**RR**H**I**N**ED**AIL** **TDI**-**H**ST**D**TH**Q**E**K**O**E**F**T**--**IT**E**D** **D**F**T**G**L**K**L**I**K**V**P**K**R**E**H**L**P**ISS**SS**SS**MD**E**TR**K**N**A**LE**I**EF**F**T**E**Y**G**E**--**AS**R**Y**Q**W**Q**EV**  
30 AtMPK9 -----  
31 AtMPK17 -----  
32 AtMPK8 -----**MG**GG**GN**LV**D**G**V**RR**W**L**FQ**RP**SS**SS**SS**SS**SN**NN**N**N**H**E**Q**E**P**I**F**SS**S**SS**SS**SN**P**HS**AN**S**G**E**L**I**E**D**L**D**F**S**G**L**I**N**V**P**K**R**N**H**L**P**MD**P**H**K**Q**E**I**E**F**F**T**E**Y**G**E**--**AN**R**V**Q**LD**EV  
33 AtMPK15 -----**MG**GG**GN**LV**D**G**V**RR**W**L**FQ**RP**SS**SS**SS**-----**NN**H**D**-**I**ON**P**T**YS**--**N**EN**DD**E**D**---**L**K**K**I**T**D**P**S**K**I**R**O**I**K**Q**Q**R**N**H**L**P**E**M**E**K**K**GI**EN**A**E**F**F**T**E**Y**G**E**--**AN**R**V**Q**LD**EV  
34 LeMPK13 -----  
35 AtMPK16 -----**MQ**P**D**Q**R**K**K**S**S**VE**D**F**T**E**Y**G**E**--**S**R**Y**K**L**EV  
36 LeMPK10 -----**MQ**D**H**R**K**K**S**VE**D**F**T**E**Y**G**E**--**S**R**Y**K**L**EV  
37 LeMPK11\* -----**MQ**Q**D**H**R**K**K**N**T**KE**VE**F**F**T**E**Y**G**E--**AN**R**Y**K**L**EV  
38 AtMPK18 -----**ME**F**F**T**E**Y**G**D--**AN**R**Y**R**L**EV  
39 AtMPK19 -----**ME**F**F**T**E**Y**G**D--**AN**R**Y**R**L**EV  
40 LeMPK12 -----**MQ**P**D**H**R**K**K**S**S**A**E**W**D**F**S**E**Y**G**D**--**AN**R**Y**K**L**EV  
41 AtMPK20 -----**MQ**Q**D**N**R**K**K**N**N**L**E**M**F**F**S**D**Y**G**D**--**AN**R**F**K**V**Q**EV**

ruler

1.....10.....20.....30.....40.....50.....60.....70.....80.....90.....100.....110.....

|    |          |                    |                                  |                   |              |                            |
|----|----------|--------------------|----------------------------------|-------------------|--------------|----------------------------|
| 1  | LemPK2   | IGKGYGVVCSALINSET  | NEHYAIKKLANAFDNKIDAKRTRREIKLRRMD | HENVAIRDDIIPPOREA | ENDVYIAYEIMD | DLHQIIRSNQGLSEHCQYFLYQIIRG |
| 2  | NtNtF4   | IGKGYGVVCSALINSET  | NEHYAIKKLANAFDNKIDAKRTRREIKLRRMD | HENVAIRDDIIPPOREA | ENDVYIAYEIMD | DLHQIIRSNQGLSEHCQYFLYQIIRG |
| 3  | LemPK1   | IGKGYGVVCSALINSET  | NEHYAIKKLANAFDNKIDAKRTRREIKLRRMD | HENVAIRDDIIPPOREA | ENDVYIAYEIMD | DLHQIIRSNQGLSEHCQYFLYQIIRG |
| 4  | NtSIPK   | IGRGYGVVCSALINSET  | NEHYAIKKLANAFDNKIDAKRTRREIKLRRMD | HENVAIRDDIIPPOREA | ENDVYIAYEIMD | DLHQIIRSNQGLSEHCQYFLYQIIRG |
| 5  | AtMPK6   | IGKGYGVVCSAMNSET   | NEHYAIKKLANAFDNKIDAKRTRREIKLRRMD | HENVAIRDDIIPPOREA | ENDVYIAYEIMD | DLHQIIRSNQGLSEHCQYFLYQIIRG |
| 6  | LemPK3   | IGRGYGVVCSVFNDEL   | NEHYAIKKLANAFDNKIDAKRTRREIKLRRMD | HENVAIRDDIIPPOREA | ENDVYIAYEIMD | DLHQIIRSNQGLSEHCQYFLYQIIRG |
| 7  | NtWIPK   | IGRGYGVVCSVFNDEL   | NEHYAIKKLANAFDNKIDAKRTRREIKLRRMD | HENVAIRDDIIPPOREA | ENDVYIAYEIMD | DLHQIIRSNQGLSEHCQYFLYQIIRG |
| 8  | AtMPK3   | IGRGYGVVCSVDLET    | NEHYAIKKLANAFDNKIDAKRTRREIKLRRMD | HENVAIRDDIIPPOREA | ENDVYIAYEIMD | DLHQIIRSNQGLSEHCQYFLYQIIRG |
| 9  | AtMPK10  | IGRGACGIVCSAAYVSET | NEHYAIKKLANAFDNKIDAKRTRREIKLRRMD | HENVAIRDDIIPPOREA | ENDVYIAYEIMD | DLHQIIRSNQGLSEHCQYFLYQIIRG |
| 10 | LemPK6   | IGRGANGVCAAVVNSEI  | NEHYAIKKLANAFDNKIDAKRTRREIKLRRMD | HENVAIRDDIIPPOREA | ENDVYIAYEIMD | DLHQIIRSNQGLSEHCQYFLYQIIRG |
| 11 | LemPK5   | IGRGYGVVCAAINSET   | NEHYAIKKLANAFDNKIDAKRTRREIKLRRMD | HENVAIRDDIIPPOREA | ENDVYIAYEIMD | DLHQIIRSNQGLSEHCQYFLYQIIRG |
| 12 | AtMPK4   | IGRGACGIVCAAVNSVT  | NEHYAIKKLANAFDNKIDAKRTRREIKLRRMD | HENVAIRDDIIPPOREA | ENDVYIAYEIMD | DLHQIIRSNQGLSEHCQYFLYQIIRG |
| 13 | AtMPK12  | IGRGYGVVCAAVNSVT   | NEHYAIKKLANAFDNKIDAKRTRREIKLRRMD | HENVAIRDDIIPPOREA | ENDVYIAYEIMD | DLHQIIRSNQGLSEHCQYFLYQIIRG |
| 14 | LemPK7   | IGRGYGVVCAAVNSVT   | NEHYAIKKLANAFDNKIDAKRTRREIKLRRMD | HENVAIRDDIIPPOREA | ENDVYIAYEIMD | DLHQIIRSNQGLSEHCQYFLYQIIRG |
| 15 | AtMPK5   | IGRGYGVVXLAAVNSVT  | NEHYAIKKLANAFDNKIDAKRTRREIKLRRMD | HENVAIRDDIIPPOREA | ENDVYIAYEIMD | DLHQIIRSNQGLSEHCQYFLYQIIRG |
| 16 | AtMPK11  | IGRGYGVVCAAVNSVT   | NEHYAIKKLANAFDNKIDAKRTRREIKLRRMD | HENVAIRDDIIPPOREA | ENDVYIAYEIMD | DLHQIIRSNQGLSEHCQYFLYQIIRG |
| 17 | LemPK4   | IGRGYGVVCAAVNSVT   | NEHYAIKKLANAFDNKIDAKRTRREIKLRRMD | HENVAIRDDIIPPOREA | ENDVYIAYEIMD | DLHQIIRSNQGLSEHCQYFLYQIIRG |
| 18 | NtNtF6   | IGRGYGVVCAAVNSVT   | NEHYAIKKLANAFDNKIDAKRTRREIKLRRMD | HENVAIRDDIIPPOREA | ENDVYIAYEIMD | DLHQIIRSNQGLSEHCQYFLYQIIRG |
| 19 | AtMPK13  | IGRGYGVVCSVNSDI    | NEHYAIKKLANAFDNKIDAKRTRREIKLRRMD | HENVAIRDDIIPPOREA | ENDVYIAYEIMD | DLHQIIRSNQGLSEHCQYFLYQIIRG |
| 20 | AtMPK1   | IGRGYGVVCSVNSDI    | NEHYAIKKLANAFDNKIDAKRTRREIKLRRMD | HENVAIRDDIIPPOREA | ENDVYIAYEIMD | DLHQIIRSNQGLSEHCQYFLYQIIRG |
| 21 | AtMPK2   | IGRGYGVVCSVNSDI    | NEHYAIKKLANAFDNKIDAKRTRREIKLRRMD | HENVAIRDDIIPPOREA | ENDVYIAYEIMD | DLHQIIRSNQGLSEHCQYFLYQIIRG |
| 22 | LemPK9   | IGRGYGVVCSVNSDI    | NEHYAIKKLANAFDNKIDAKRTRREIKLRRMD | HENVAIRDDIIPPOREA | ENDVYIAYEIMD | DLHQIIRSNQGLSEHCQYFLYQIIRG |
| 23 | AtMPK7   | IGRGYGVVCSVNSDI    | NEHYAIKKLANAFDNKIDAKRTRREIKLRRMD | HENVAIRDDIIPPOREA | ENDVYIAYEIMD | DLHQIIRSNQGLSEHCQYFLYQIIRG |
| 24 | AtMPK14  | IGRGYGVVCSVNSDI    | NEHYAIKKLANAFDNKIDAKRTRREIKLRRMD | HENVAIRDDIIPPOREA | ENDVYIAYEIMD | DLHQIIRSNQGLSEHCQYFLYQIIRG |
| 25 | LemPK8   | IGRGYGVVCSVNSDI    | NEHYAIKKLANAFDNKIDAKRTRREIKLRRMD | HENVAIRDDIIPPOREA | ENDVYIAYEIMD | DLHQIIRSNQGLSEHCQYFLYQIIRG |
| 26 | HsERK1   | IGEGYGVVCSAVDHR    | NEHYAIKKLANAFDNKIDAKRTRREIKLRRMD | HENVAIRDDIIPPOREA | ENDVYIAYEIMD | DLHQIIRSNQGLSEHCQYFLYQIIRG |
| 27 | LemPK14  | IGKGYGVVAAVADIDHT  | NEHYAIKKLANAFDNKIDAKRTRREIKLRRMD | HENVAIRDDIIPPOREA | ENDVYIAYEIMD | DLHQIIRSNQGLSEHCQYFLYQIIRG |
| 28 | LemPK15* | IGKGYGVVAAVADIDHT  | NEHYAIKKLANAFDNKIDAKRTRREIKLRRMD | HENVAIRDDIIPPOREA | ENDVYIAYEIMD | DLHQIIRSNQGLSEHCQYFLYQIIRG |
| 29 | LemPK16  | IGKGYGVVAAVADIDHT  | NEHYAIKKLANAFDNKIDAKRTRREIKLRRMD | HENVAIRDDIIPPOREA | ENDVYIAYEIMD | DLHQIIRSNQGLSEHCQYFLYQIIRG |
| 30 | AtMPK9   | IGKGYGVVAAVADIDHT  | NEHYAIKKLANAFDNKIDAKRTRREIKLRRMD | HENVAIRDDIIPPOREA | ENDVYIAYEIMD | DLHQIIRSNQGLSEHCQYFLYQIIRG |
| 31 | AtMPK17  | IGKGYGVVAAVADIDHT  | NEHYAIKKLANAFDNKIDAKRTRREIKLRRMD | HENVAIRDDIIPPOREA | ENDVYIAYEIMD | DLHQIIRSNQGLSEHCQYFLYQIIRG |
| 32 | AtMPK8   | IGKGYGVVAAVADIDHT  | NEHYAIKKLANAFDNKIDAKRTRREIKLRRMD | HENVAIRDDIIPPOREA | ENDVYIAYEIMD | DLHQIIRSNQGLSEHCQYFLYQIIRG |
| 33 | AtMPK15  | IGKGYGVVAAVADIDHT  | NEHYAIKKLANAFDNKIDAKRTRREIKLRRMD | HENVAIRDDIIPPOREA | ENDVYIAYEIMD | DLHQIIRSNQGLSEHCQYFLYQIIRG |
| 34 | LemPK13  | IGKGYGVVAAVADIDHT  | NEHYAIKKLANAFDNKIDAKRTRREIKLRRMD | HENVAIRDDIIPPOREA | ENDVYIAYEIMD | DLHQIIRSNQGLSEHCQYFLYQIIRG |
| 35 | AtMPK16  | IGKGYGVVAAVADIDHT  | NEHYAIKKLANAFDNKIDAKRTRREIKLRRMD | HENVAIRDDIIPPOREA | ENDVYIAYEIMD | DLHQIIRSNQGLSEHCQYFLYQIIRG |
| 36 | LemPK10  | IGKGYGVVAAVADIDHT  | NEHYAIKKLANAFDNKIDAKRTRREIKLRRMD | HENVAIRDDIIPPOREA | ENDVYIAYEIMD | DLHQIIRSNQGLSEHCQYFLYQIIRG |
| 37 | LemPK11* | IGKGYGVVAAVADIDHT  | NEHYAIKKLANAFDNKIDAKRTRREIKLRRMD | HENVAIRDDIIPPOREA | ENDVYIAYEIMD | DLHQIIRSNQGLSEHCQYFLYQIIRG |
| 38 | AtMPK18  | IGKGYGVVCAADIDHT   | NEHYAIKKLANAFDNKIDAKRTRREIKLRRMD | HENVAIRDDIIPPOREA | ENDVYIAYEIMD | DLHQIIRSNQGLSEHCQYFLYQIIRG |
| 39 | AtMPK19  | IGKGYGVVCAADIDHT   | NEHYAIKKLANAFDNKIDAKRTRREIKLRRMD | HENVAIRDDIIPPOREA | ENDVYIAYEIMD | DLHQIIRSNQGLSEHCQYFLYQIIRG |
| 40 | LemPK12  | IGKGYGVVCAADIDHT   | NEHYAIKKLANAFDNKIDAKRTRREIKLRRMD | HENVAIRDDIIPPOREA | ENDVYIAYEIMD | DLHQIIRSNQGLSEHCQYFLYQIIRG |
| 41 | AtMPK20  | IGKGYGVVCAADIDHT   | NEHYAIKKLANAFDNKIDAKRTRREIKLRRMD | HENVAIRDDIIPPOREA | ENDVYIAYEIMD | DLHQIIRSNQGLSEHCQYFLYQIIRG |

ruler

120.....130.....140.....150.....160.....170.....180.....190.....200.....210.....220.....230

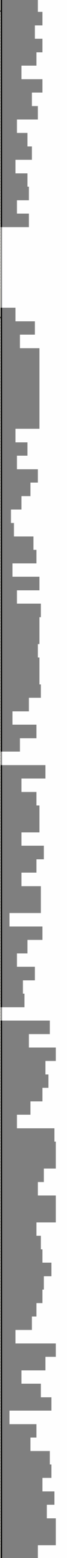

1 LemPK2  
 2 NtNtF4  
 3 LemPK1  
 4 NtSiPK  
 5 AtMPK6  
 6 LemPK3  
 7 NtWiPK  
 8 AtMPK3  
 9 AtMPK10  
 10 LemPK6  
 11 LemPK5  
 12 AtMPK4  
 13 AtMPK12  
 14 LemPK7  
 15 AtMPK5  
 16 AtMPK11  
 17 LemPK4  
 18 NtNtF6  
 19 AtMPK13  
 20 AtMPK1  
 21 AtMPK2  
 22 LemPK9  
 23 AtMPK7  
 24 AtMPK14  
 25 LemPK8  
 26 HsERK1  
 27 LemPK14  
 28 LemPK15\*  
 29 LemPK16  
 30 AtMPK9  
 31 AtMPK17  
 32 AtMPK8  
 33 AtMPK15  
 34 LemPK13  
 35 AtMPK16  
 36 LemPK10  
 37 LemPK11\*  
 38 AtMPK18  
 39 AtMPK19  
 40 LemPK12  
 41 AtMPK20

ruler

.....240.....250.....260.....270.....280.....290.....300.....310.....320.....330.....340.....3

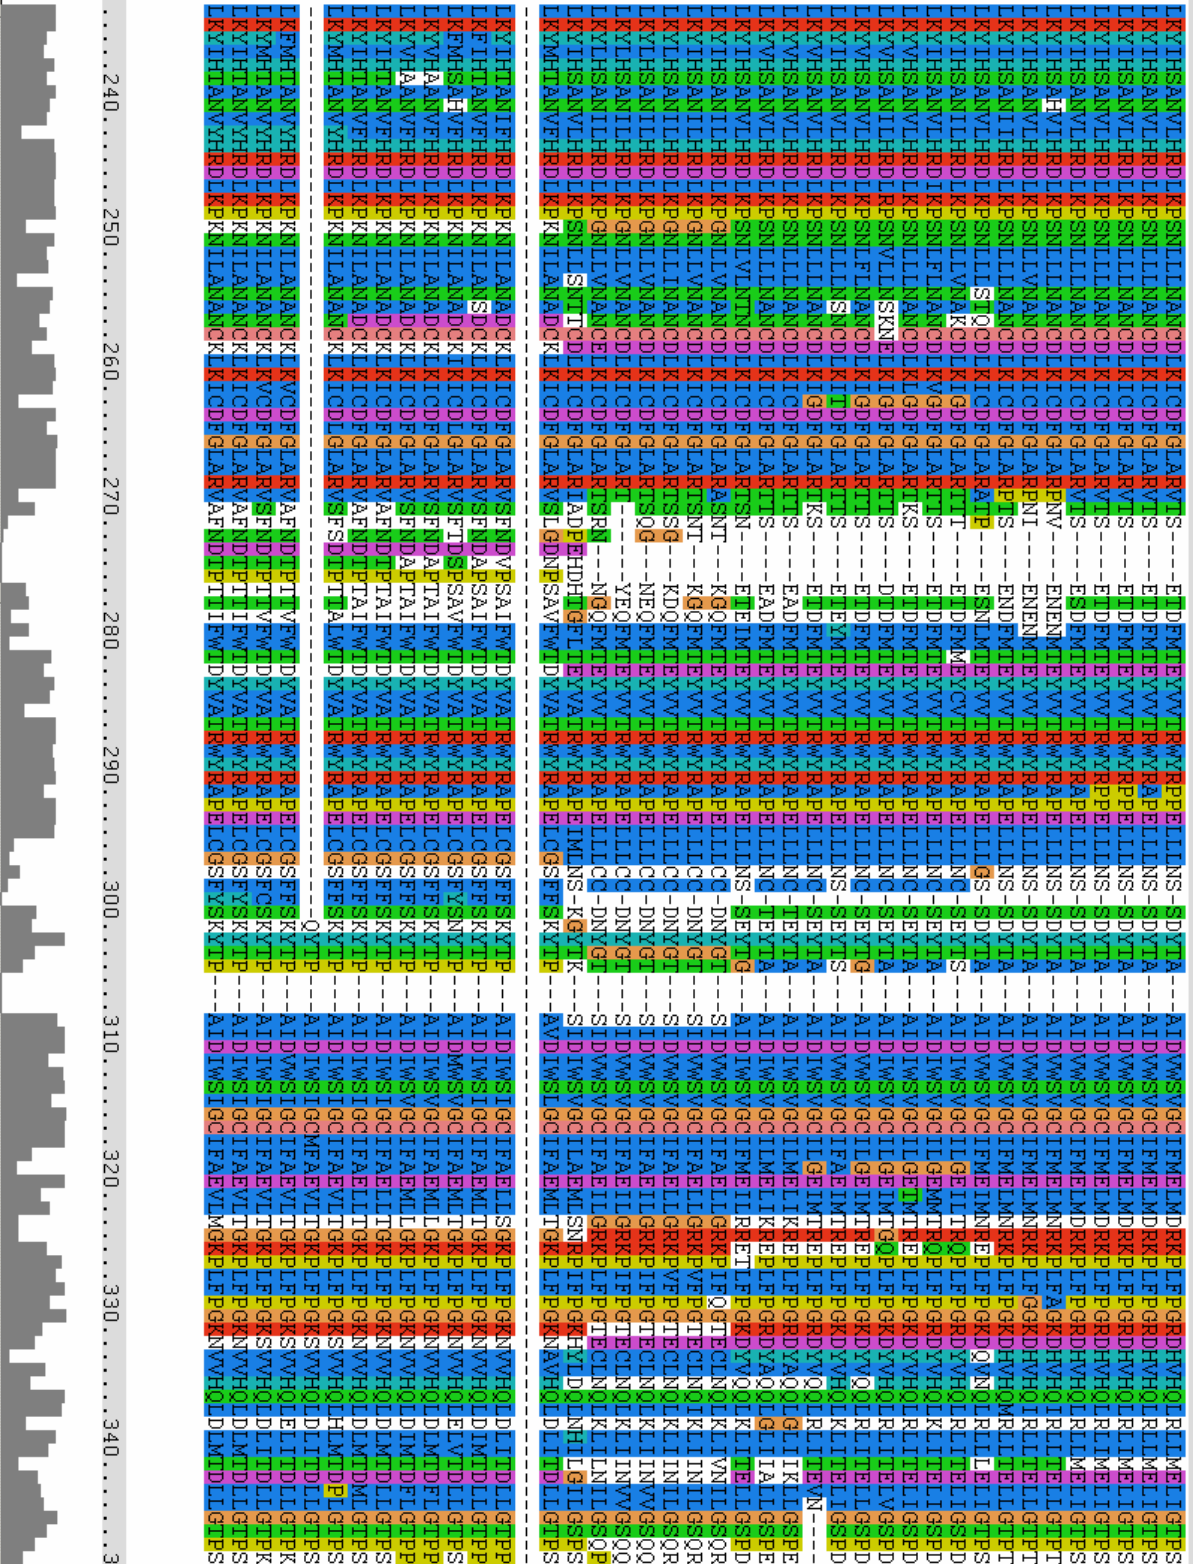



1 L6M6K2 EAEMFEL-**NEN**KRYIRQ PLYRROSEVEK**EPH**NPAAIDLVEMKILFDPRRRIIVEDALAHPLYLTSIEDISDEPVQMTPTS--**FD**FEQHA-**LE**EQMKELIYREGALANPEYQHM  
 2 N6MNTF4 EAEMFEL-**NEN**KRYIRQ PLYRROSEVEK**EPH**NPAAIDLVEMKILFDPRRRIIVEDALAHPLYLTSIEDISDEPVQMTPTS--**FD**FEQHA-**LE**EQMKELIYREGALANPEYQHM  
 3 L6M6K1 EAEMFEL-**NEN**KRYIRQ PLYRROSEVEK**EPH**NPAAIDLVEMKILFDPRRRIIVEDALAHPLYLTSIEDISDEPVQMTPTS--**FD**FEQHA-**LE**EQMKELIYREGALANPEYQHM  
 4 N6SLTPK EAEMFEL-**NEN**KRYIRQ PLYRROSEVEK**EPH**NPAAIDLVEMKILFDPRRRIIVEDALAHPLYLTSIEDISDEPVQMTPTS--**FD**FEQHA-**LE**EQMKELIYREGALANPEYQHM  
 5 A6M6K6 EEELFEL-**NEN**KRYIRQ PLYRROSEVEK**EPH**NPAAIDLVEMKILFDPRRRIIVEDALAHPLYLTSIEDISDEPVQMTPTS--**FD**FEQHA-**LE**EQMKELIYREGALANPEYQHM  
 6 L6M6K3 ESDSEL**RE**VEDAKRYIRQ PLYRROSEVEK**EPH**NPAAIDLVEMKILFDPRRRIIVEDALAHPLYLTSIEDISDEPVQMTPTS--**FD**FEQHA-**LE**EQMKELIYREGALANPEYQHM  
 7 N6W1PK EADGEL**ION**EDAKRYIRQ PLYRROSEVEK**EPH**NPAAIDLVEMKILFDPRRRIIVEDALAHPLYLTSIEDISDEPVQMTPTS--**FD**FEQHA-**LE**EQMKELIYREGALANPEYQHM  
 8 A6M6K3 ESDSEL**RE**VEDAKRYIRQ PLYRROSEVEK**EPH**NPAAIDLVEMKILFDPRRRIIVEDALAHPLYLTSIEDISDEPVQMTPTS--**FD**FEQHA-**LE**EQMKELIYREGALANPEYQHM  
 9 A6M6K10 EEEL**GS**-SEYAKRYIRQ PLYRROSEVEK**EPH**NPAAIDLVEMKILFDPRRRIIVEDALAHPLYLTSIEDISDEPVQMTPTS--**FD**FEQHA-**LE**EQMKELIYREGALANPEYQHM  
 10 L6M6K6 DASL**GE**LRSDNRRYRQ PLYRROSEVEK**EPH**NPAAIDLVEMKILFDPRRRIIVEDALAHPLYLTSIEDISDEPVQMTPTS--**FD**FEQHA-**LE**EQMKELIYREGALANPEYQHM  
 11 L6M6K4 DASL**GE**LRSDNRRYRQ PLYRROSEVEK**EPH**NPAAIDLVEMKILFDPRRRIIVEDALAHPLYLTSIEDISDEPVQMTPTS--**FD**FEQHA-**LE**EQMKELIYREGALANPEYQHM  
 12 A6M6K4 DSSL**GE**LRSDNRRYRQ PLYRROSEVEK**EPH**NPAAIDLVEMKILFDPRRRIIVEDALAHPLYLTSIEDISDEPVQMTPTS--**FD**FEQHA-**LE**EQMKELIYREGALANPEYQHM  
 13 A6M6K12 NSSL**GE**LRSDNRRYRQ PLYRROSEVEK**EPH**NPAAIDLVEMKILFDPRRRIIVEDALAHPLYLTSIEDISDEPVQMTPTS--**FD**FEQHA-**LE**EQMKELIYREGALANPEYQHM  
 14 L6M6K7 DASL**GE**LRSDNRRYRQ PLYRROSEVEK**EPH**NPAAIDLVEMKILFDPRRRIIVEDALAHPLYLTSIEDISDEPVQMTPTS--**FD**FEQHA-**LE**EQMKELIYREGALANPEYQHM  
 15 A6M6K5 GASL**GE**LRSDNRRYRQ PLYRROSEVEK**EPH**NPAAIDLVEMKILFDPRRRIIVEDALAHPLYLTSIEDISDEPVQMTPTS--**FD**FEQHA-**LE**EQMKELIYREGALANPEYQHM  
 16 A6M6K11 -----**SL**PHL**IL**LR-----**LK**KH-----**FD**FEQHA-**LE**EQMKELIYREGALANPEYQHM  
 17 L6M6K4 ESD**GE**LRSDNRRYRQ PLYRROSEVEK**EPH**NPAAIDLVEMKILFDPRRRIIVEDALAHPLYLTSIEDISDEPVQMTPTS--**FD**FEQHA-**LE**EQMKELIYREGALANPEYQHM  
 18 N6MNTF6 DSD**GE**LRSDNRRYRQ PLYRROSEVEK**EPH**NPAAIDLVEMKILFDPRRRIIVEDALAHPLYLTSIEDISDEPVQMTPTS--**FD**FEQHA-**LE**EQMKELIYREGALANPEYQHM  
 19 A6M6K13 DSD**GE**LRSDNRRYRQ PLYRROSEVEK**EPH**NPAAIDLVEMKILFDPRRRIIVEDALAHPLYLTSIEDISDEPVQMTPTS--**FD**FEQHA-**LE**EQMKELIYREGALANPEYQHM  
 20 A6M6K1 EEDLE**FD**PKAKRYIRK PLYRROSEVEK**EPH**NPAAIDLVEMKILFDPRRRIIVEDALAHPLYLTSIEDISDEPVQMTPTS--**FD**FEQHA-**LE**EQMKELIYREGALANPEYQHM  
 21 A6M6K2 EEDLE**FD**PKAKRYIRK PLYRROSEVEK**EPH**NPAAIDLVEMKILFDPRRRIIVEDALAHPLYLTSIEDISDEPVQMTPTS--**FD**FEQHA-**LE**EQMKELIYREGALANPEYQHM  
 22 L6M6K7 EEDLE**FD**PKAKRYIRK PLYRROSEVEK**EPH**NPAAIDLVEMKILFDPRRRIIVEDALAHPLYLTSIEDISDEPVQMTPTS--**FD**FEQHA-**LE**EQMKELIYREGALANPEYQHM  
 23 A6M6K9 ESD**RE**IDNPKAKRYIKS PLYRROSEVEK**EPH**NPAAIDLVEMKILFDPRRRIIVEDALAHPLYLTSIEDISDEPVQMTPTS--**FD**FEQHA-**LE**EQMKELIYREGALANPEYQHM  
 24 A6M6K14 DMD**Q**FDNPKAKRYIKS PLYRROSEVEK**EPH**NPAAIDLVEMKILFDPRRRIIVEDALAHPLYLTSIEDISDEPVQMTPTS--**FD**FEQHA-**LE**EQMKELIYREGALANPEYQHM  
 25 L6M6K8 EAD**HE**IDNPKAKRYIKS PLYRROSEVEK**EPH**NPAAIDLVEMKILFDPRRRIIVEDALAHPLYLTSIEDISDEPVQMTPTS--**FD**FEQHA-**LE**EQMKELIYREGALANPEYQHM  
 26 H6M6K1 QED**LN**GIILMKAKRYIGS PLYRROSEVEK**EPH**NPAAIDLVEMKILFDPRRRIIVEDALAHPLYLTSIEDISDEPVQMTPTS--**FD**FEQHA-**LE**EQMKELIYREGALANPEYQHM  
 27 L6M6K14 TEAL**SR**IKNEKAKRYIKS PLYRROSEVEK**EPH**NPAAIDLVEMKILFDPRRRIIVEDALAHPLYLTSIEDISDEPVQMTPTS--**FD**FEQHA-**LE**EQMKELIYREGALANPEYQHM  
 28 L6M6K15\* -----**Y**ERGLAN**TE**NE**SR**PI**SK**SE**FD**ER**RR**LS**ED**ITELIYREIIEYHPQMLQ**E**  
 29 L6M6K16 PEAL**AR**IKNEKAKRYIKS PLYRROSEVEK**EPH**NPAAIDLVEMKILFDPRRRIIVEDALAHPLYLTSIEDISDEPVQMTPTS--**FD**FEQHA-**LE**EQMKELIYREGALANPEYQHM  
 30 A6M6K9 PEAL**AR**IKNEKAKRYIKS PLYRROSEVEK**EPH**NPAAIDLVEMKILFDPRRRIIVEDALAHPLYLTSIEDISDEPVQMTPTS--**FD**FEQHA-**LE**EQMKELIYREGALANPEYQHM  
 31 A6M6K17 PITT**SR**IKNEKAKRYIKS PLYRROSEVEK**EPH**NPAAIDLVEMKILFDPRRRIIVEDALAHPLYLTSIEDISDEPVQMTPTS--**FD**FEQHA-**LE**EQMKELIYREGALANPEYQHM  
 32 A6M6K8 PES**IS**IKRNEKAKRYIKS PLYRROSEVEK**EPH**NPAAIDLVEMKILFDPRRRIIVEDALAHPLYLTSIEDISDEPVQMTPTS--**FD**FEQHA-**LE**EQMKELIYREGALANPEYQHM  
 33 A6M6K15 PEAS**IK**RNDKARRYLGN**RR**KKQ**Y**VF**SH**K**PK**AD**LA**IRLE**RL**AF**DE**KD**RS**A**EE**AD**AD**AD**Y**FN**GL**SS**K**VR**ES**TI**Q**PI**SK**IE**FE**ER**RR**LV**K**DD**VR**ELIYREIIEYHPQML**Q**  
 34 L6M6K13 PES**IA**IKRNEKAKRYIKS PLYRROSEVEK**EPH**NPAAIDLVEMKILFDPRRRIIVEDALAHPLYLTSIEDISDEPVQMTPTS--**FD**FEQHA-**LE**EQMKELIYREGALANPEYQHM  
 35 A6M6K16 AEAL**GR**IKNEKAKRYIKS PLYRROSEVEK**EPH**NPAAIDLVEMKILFDPRRRIIVEDALAHPLYLTSIEDISDEPVQMTPTS--**FD**FEQHA-**LE**EQMKELIYREGALANPEYQHM  
 36 L6M6K10 ADS**KS**SVRNEKAKRYIKS PLYRROSEVEK**EPH**NPAAIDLVEMKILFDPRRRIIVEDALAHPLYLTSIEDISDEPVQMTPTS--**FD**FEQHA-**LE**EQMKELIYREGALANPEYQHM  
 37 L6M6K11\* VD**IV**SVRNEKAKRYIKS PLYRROSEVEK**EPH**NPAAIDLVEMKILFDPRRRIIVEDALAHPLYLTSIEDISDEPVQMTPTS--**FD**FEQHA-**LE**EQMKELIYREGALANPEYQHM  
 38 A6M6K18 SET**IS**SVRNEKAKRYIKS PLYRROSEVEK**EPH**NPAAIDLVEMKILFDPRRRIIVEDALAHPLYLTSIEDISDEPVQMTPTS--**FD**FEQHA-**LE**EQMKELIYREGALANPEYQHM  
 39 A6M6K19 SET**IA**SVRNEKAKRYIKS PLYRROSEVEK**EPH**NPAAIDLVEMKILFDPRRRIIVEDALAHPLYLTSIEDISDEPVQMTPTS--**FD**FEQHA-**LE**EQMKELIYREGALANPEYQHM  
 40 L6M6K12 MD**TI**SVRNEKAKRYIKS PLYRROSEVEK**EPH**NPAAIDLVEMKILFDPRRRIIVEDALAHPLYLTSIEDISDEPVQMTPTS--**FD**FEQHA-**LE**EQMKELIYREGALANPEYQHM  
 41 A6M6K20 LD**TI**SVRNEKAKRYIKS PLYRROSEVEK**EPH**NPAAIDLVEMKILFDPRRRIIVEDALAHPLYLTSIEDISDEPVQMTPTS--**FD**FEQHA-**LE**EQMKELIYREGALANPEYQHM

ruler 50.....360.....370.....380.....390.....400.....410.....420.....430.....440.....450.....460.....

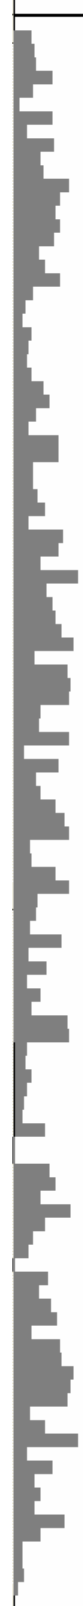

|    |          |       |       |
|----|----------|-------|-------|
| 1  | LempK2   | ----- | ----- |
| 2  | NtNTF4   | ----- | ----- |
| 3  | LempK1   | ----- | ----- |
| 4  | NtSIPK   | ----- | ----- |
| 5  | AtMPK6   | ----- | ----- |
| 6  | LempK3   | ----- | ----- |
| 7  | NtWIPK   | ----- | ----- |
| 8  | AtMPK3   | ----- | ----- |
| 9  | AtMPK10  | ----- | ----- |
| 10 | LempK6   | ----- | ----- |
| 11 | LempK5   | ----- | ----- |
| 12 | AtMPK4   | ----- | ----- |
| 13 | AtMPK12  | ----- | ----- |
| 14 | LempK7   | ----- | ----- |
| 15 | AtMPK5   | ----- | ----- |
| 16 | AtMPK11  | ----- | ----- |
| 17 | LempK4   | ----- | ----- |
| 18 | NtNTF6   | ----- | ----- |
| 19 | AtMPK13  | ----- | ----- |
| 20 | AtMPK1   | ----- | ----- |
| 21 | AtMPK2   | ----- | ----- |
| 22 | LempK9   | ----- | ----- |
| 23 | AtMPK7   | ----- | ----- |
| 24 | AtMPK14  | ----- | ----- |
| 25 | LempK8   | ----- | ----- |
| 26 | HsERK1   | ----- | ----- |
| 27 | LempK14  | ----- | ----- |
| 28 | LempK15* | ----- | ----- |
| 29 | LempK16  | ----- | ----- |
| 30 | AtMPK9   | ----- | ----- |
| 31 | AtMPK17  | ----- | ----- |
| 32 | AtMPK8   | ----- | ----- |
| 33 | AtMPK15  | ----- | ----- |
| 34 | LempK13  | ----- | ----- |
| 35 | AtMPK16  | ----- | ----- |
| 36 | LempK10  | ----- | ----- |
| 37 | LempK11* | ----- | ----- |
| 38 | AtMPK18  | ----- | ----- |
| 39 | AtMPK19  | ----- | ----- |
| 40 | LempK12  | ----- | ----- |
| 41 | AtMPK20  | ----- | ----- |

470.....480.....490.....500.....510.....520.....530.....540.....550.....560.....570.....580

ruler



|    |          |                                                |
|----|----------|------------------------------------------------|
| 1  | LemPK2   | -----                                          |
| 2  | NtNTF4   | -----                                          |
| 3  | LemPK1   | -----                                          |
| 4  | NtSIPK   | -----                                          |
| 5  | AtMPK6   | -----                                          |
| 6  | LemPK3   | -----                                          |
| 7  | NtWIPK   | -----                                          |
| 8  | AtMPK3   | -----                                          |
| 9  | AtMPK10  | -----                                          |
| 10 | LemPK6   | -----                                          |
| 11 | LemPK5   | -----                                          |
| 12 | AtMPK4   | -----                                          |
| 13 | AtMPK12  | -----                                          |
| 14 | LemPK7   | -----                                          |
| 15 | AtMPK5   | -----                                          |
| 16 | AtMPK11  | -----                                          |
| 17 | LemPK4   | -----                                          |
| 18 | NtNTF6   | -----                                          |
| 19 | AtMPK13  | -----                                          |
| 20 | AtMPK1   | -----                                          |
| 21 | AtMPK2   | -----                                          |
| 22 | LemPK9   | -----                                          |
| 23 | AtMPK7   | -----                                          |
| 24 | AtMPK14  | -----                                          |
| 25 | LemPK8   | -----                                          |
| 26 | HsERK1   | -----                                          |
| 27 | LemPK14  | -----                                          |
| 28 | LemPK15* | DTIYKRY--DNGISRSSKEPATIYA                      |
| 29 | LemPK16  | FEPLEEQ--NEEVDGLSOEVASLHW                      |
| 30 | AtMPK9   | E--GESN--NDTVDALSQKVAALHT                      |
| 31 | AtMPK17  | -----                                          |
| 32 | AtMPK8   | EDLIAEEDNETVAELTDKVASLHNS                      |
| 33 | AtMPK15  | -----                                          |
| 34 | LemPK13  | HSCKNERG-EDSTEVSNQ-VQPKF-EQYIARKAAAPGGGPNQWY   |
| 35 | AtMPK16  | TQPCRSNRQEDDCATAAEGSPRLKPNITQYIPOKSSAODTMSRMWY |
| 36 | LemPK10  | QIRIDAKLLQAQIKFGAVGAAAVAV--AAHREYGTIQYSLI      |
| 37 | LemPK11* | QIAMDAKLLQAQIQFGAVGAAAVAV--AAHREYGTVOYGF       |
| 38 | AtMPK18  | HMRIDAKLLQAQSQFGPAGAAAVAV--AAHRTGLISYSAS       |
| 39 | AtMPK19  | KVGIIDAKLLHAQSQYGGPAGAAAVAV--AAHRTGAVGYGKS     |
| 40 | LemPK12  | RIIDTNLLQAQSQYGGIGVAAAAITSGAHRKGLVOYGNSRMV     |
| 41 | AtMPK20  | RIIDTNLLQAQATAGIIVAAAAAAPGGSAHRKYGAVRYGNSKMY   |

ruler

.700.....710.....720.....730.....740...
