# Supplementary material
Source: PubMed Central journal article supplement (PMC1913740)
Supplement: plntcell_tpc.106.047621_4.pdf [file plntcell_tpc.106.047621_4.pdf]

Wild type (Col-0)

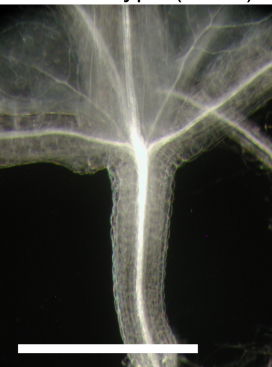

*tdt-1*

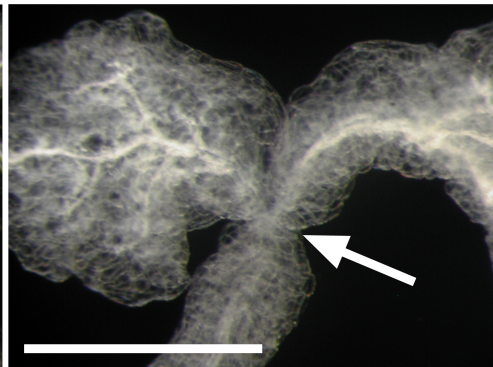

**Supplementary Figure 4.** Pinched appearance of *tdt* cotyledon petioles. The hypocotyl-cotyledon junction of wild type is smooth, whereas in the *tdt* mutant it often showed a pinched appearance (white arrow) and cotyledons tended to fall off easily. Bars = 1 mm.
