# Supplementary material
Source: PubMed Central journal article supplement (PMC1913740)
Supplement: plntcell_tpc.106.047621_5.pdf [file plntcell_tpc.106.047621_5.pdf]

## Supplemental Table 1. Genes with at least a 5-fold increased RNA level in *tdt-1* mutants

Entries shown in bold were verified by real-time RT-PCR. Relative expression levels determined by this method are shown in parenthesis.

### Metabolism, Biosynthesis, Catabolism

| Gene name | Fold change | Functional or molecular role                                                                                         |
|-----------|-------------|----------------------------------------------------------------------------------------------------------------------|
| AT5G50600 | 11.95       | short-chain dehydrogenase/reductase (SDR) family protein similar to sterol-binding dehydrogenase steroleosin         |
| AT3G49160 | 7.53        | pyruvate kinase family protein                                                                                       |
| AT1G28030 | 6.46        | 2OG-Fe(II) oxygenase family protein, glucosinolate biosynthesis                                                      |
| AT1G20120 | 10.77       | extracellular lipase, family II EXL3, putative, Anther-specific proline-rich protein APG precursor, lipid metabolism |
| AT5G11920 | 5.23        | glycosyl hydrolase family 32 protein similar to fructan 1-exohydrolase, carbohydrate metabolism                      |
| AT4G15210 | 11.47       | beta-amylase (BMY1) / 1,4-alpha-D-glucan maltohydrolase identical to Beta-amylase, starch catabolism                 |
| AT1G22210 | 5.15        | trehalose-6-phosphate phosphatase, putative similar to AtTPPB, trehalose biosynthesis                                |
| AT1G56600 | 5.27        | galactinol synthase, carbohydrate biosynthesis                                                                       |
| AT2G47180 | 9.33        | galactinol synthase, carbohydrate biosynthesis                                                                       |
| AT3G19270 | 7.11        | cytochrome P450 family protein similar to Cytochrome P450, ABA catabolism                                            |
| AT5G04380 | 19.12       | S-adenosyl-L-methionine:carboxyl methyltransferase family                                                            |

### Signaling and Responses

|           |       |                                                                                                              |
|-----------|-------|--------------------------------------------------------------------------------------------------------------|
| AT3G05640 | 5.86  | protein phosphatase 2C                                                                                       |
| AT1G21550 | 5.23  | Putative calcium-binding protein,                                                                            |
| AT2G31082 | 5.07  | CLE5, putative ligand homologous to CLAVATA3                                                                 |
| AT5G59220 | 5.11  | protein phosphatase 2C, ABA induced                                                                          |
| AT5G24080 | 5.35  | contains protein kinase domain                                                                               |
| AT4G10250 | 48.23 | 22.0 kDa ER small heat shock protein (HSP22.0-ER), response to heat                                          |
| AT2G33380 | 16.14 | calcium-binding RD20 protein (RD20) induced by abscisic acid and during dehydration, contains EF-hand domain |
| AT1G12010 | 8.41  | 1-aminocyclopropane-1-carboxylate oxidase, putative / ACC oxidase, ethylene signaling                        |
| AT2G42540 | 10.56 | cold-responsive protein / identical to cold-regulated protein cor15a; Late embryogenesis abundant protein    |
| AT5G14920 | 5.97  | gibberellin-regulated family protein similar to SP P46689 Gibberellin-regulated protein 1 precursor          |

**Signaling and Responses (continued)**

| Gene name | Fold change | Functional or molecular role                                                                       |
|-----------|-------------|----------------------------------------------------------------------------------------------------|
| AT2G22860 | 8.93        | phytosulfokines 2 (PSK2) peptide growth factor precursor                                           |
| AT3G09640 | 8.84        | L-ascorbate peroxidase 1b (APX1b), oxidative stress response                                       |
| AT5G58400 | 8.25        | peroxidase, putative similar to peroxidase [ <i>Nicotiana tabacum</i> ], oxidative stress response |
| AT1G68850 | 6.05        | peroxidase, putative identical to peroxidase ATP23a, response to oxidative stress                  |
| AT4G23170 | 4.73        | protein kinase; similar to receptor-like protein kinases 4 and 5, response to salicylic acid       |
| AT5G66400 | 6.55        | dehydrin (RAB18), response to ABA, cold, and water stress                                          |

**Transport**

|           |       |                                                                                                       |
|-----------|-------|-------------------------------------------------------------------------------------------------------|
| AT5G13580 | 5.29  | ABC transporter family protein                                                                        |
| AT3G55090 | 6.83  | ABC transporter family protein ATP-binding cassette-sub-family G-member 2                             |
| AT5G59310 | 14.21 | lipid transfer protein 4 (LTP4), and responsive to ABA                                                |
| AT2G37870 | 10.49 | protease inhibitor/seed storage/lipid transfer protein (LTP) family                                   |
| AT4G33550 | 5.79  | protease inhibitor/seed storage/lipid transfer protein (LTP) family                                   |
| AT5G01870 | 9.09  | lipid transfer protein, putative similar to lipid transfer protein 6 from <i>Arabidopsis thaliana</i> |

**Embryo Development**

|                  |                       |                                                                                                 |
|------------------|-----------------------|-------------------------------------------------------------------------------------------------|
| AT2G41260        | 5.28                  | glycine-rich protein, late embryogenesis abundant protein (M17)                                 |
| <b>AT1G52690</b> | 10.71<br><b>(227)</b> | late embryogenesis abundant protein, similar to Late embryogenesis abundant protein 76 (LEA 76) |
| AT2G42560        | 5.37                  | late embryogenesis abundant domain-containing protein                                           |
| AT1G04560        | 5.31                  | AWPM-19-like membrane family protein, similar to late embryogenesis abundant protein (LEA)      |
| AT4G36600        | 15.21                 | late embryogenesis abundant domain-containing protein                                           |
| <b>AT5G06760</b> | 6.49<br><b>(61)</b>   | late embryogenesis abundant group 1 domain-containing protein                                   |
| AT5G44310        | 7.95                  | late embryogenesis abundant                                                                     |

**Transcription**

|           |      |                                                                                     |
|-----------|------|-------------------------------------------------------------------------------------|
| AT2G40340 | 5.08 | AP2 domain-containing transcription factor, Similar to DRE2B                        |
| AT3G63350 | 7.08 | heat shock transcription factor family protein contains HSF-type DNA-binding domain |
| AT2G24740 | 6.57 | SET domain-containing protein (SUVH8) identical to SUVH8                            |

**Transcription (continued)**

| Gene name | Fold change | Functional or molecular role                                                    |
|-----------|-------------|---------------------------------------------------------------------------------|
| AT4G25530 | 5.26        | homeodomain protein (FWA) identical to Homeobox protein FWA, flower development |
| AT3G24500 | 5.04        | ethylene-responsive transcriptional coactivator                                 |
| AT3G01600 | 7.17        | no apical meristem (NAM) family protein                                         |
| AT2G2615  | 10.80       | heat shock transcription factor family protein                                  |

**Protein Folding and Heat Shock Response**

|                  |                       |                                                                                                                                 |
|------------------|-----------------------|---------------------------------------------------------------------------------------------------------------------------------|
| AT1G71000        | 12.20                 | DNAJ heat shock N-terminal domain-containing protein                                                                            |
| AT5G48570        | 9.17                  | peptidyl-prolyl cis-trans isomerase, putative / FK506-binding protein, putative similar to rof1                                 |
| AT5G12030        | 13.27                 | 17.7 kDa class II heat shock protein 17.6A                                                                                      |
| <b>AT2G32120</b> | 8.00<br><b>(48.7)</b> | heat shock protein 70 family protein                                                                                            |
| <b>AT1G52560</b> | 28.21<br><b>(291)</b> | 26.5 kDa class I small heat shock protein-like (HSP26.5-P)                                                                      |
| AT1G53540        | 11.31                 | 17.6 kDa class I small heat shock protein (HSP17.6C-CI) (AA 1-156) identical to (17.6 kDa class I heat shock protein (HSP 17.6) |
| AT1G54050        | 5.31                  | 17.4 kDa class III heat shock protein (HSP17.4-CIII)                                                                            |
| AT1G59860        | 10.44                 | 17.6 kDa class I heat shock protein (HSP17.6A-CI)                                                                               |
| <b>AT3G46230</b> | 9.70<br><b>(98.3)</b> | 17.4 kDa class I heat shock protein (HSP17.4-CI)                                                                                |
| AT4G25200        | 12.43                 | 23.6 kDa mitochondrial small heat shock protein (HSP23.6-M)                                                                     |
| AT4G27670        | 28.78                 | 25.3 kDa small heat shock protein, chloroplast precursor (HSP25.3-P) I                                                          |
| AT5G12020        | 14.32                 | 17.6 kDa class II heat shock protein (HSP17.6-CII)                                                                              |
| <b>AT5G51440</b> | 7.15<br><b>(44.7)</b> | 23.5 kDa mitochondrial small heat shock protein (HSP23.5-M)                                                                     |
| AT5G59720        | 13.18                 | 18.1 kDa class I heat shock protein (HSP 18.2)                                                                                  |
| AT1G07400        | 11.45                 | 17.8 kDa class I heat shock protein (HSP17.8-CI)                                                                                |
| AT2G29500        | 10.10                 | 17.6 kDa class I small heat shock protein (HSP17.6B-CI)                                                                         |

**Electron Transport**

|           |      |                                                                                                     |
|-----------|------|-----------------------------------------------------------------------------------------------------|
| AT1G65340 | 8.01 | cytochrome P450, putative similar to cytochrome P450 GI:4688670 from [ <i>Catharanthus roseus</i> ] |
| AT3G26280 | 6.21 | cytochrome P450 monooxygenase (CYP71B4)                                                             |
| AT5G02900 | 5.92 | cytochrome P450, putative cytochrome P450 homolog                                                   |
| AT4G39500 | 5.95 | cytochrome P450, (CYP96A11)                                                                         |

**Proteolysis, proteolysis-related**

| Gene name | Fold change | Functional or molecular role                                                                       |
|-----------|-------------|----------------------------------------------------------------------------------------------------|
| AT1G20160 | 9.45        | subtilase family protein similar to subtilisin-type protease precursor                             |
| AT5G08260 | 6.34        | serine carboxypeptidase S10 family protein similar to Serine carboxypeptidase II chains A and B    |
| AT5G24820 | 27.10       | aspartyl protease family protein low similarity to CND41, chloroplast nucleoid DNA binding protein |
| AT5G50260 | 7.60        | cysteine proteinase, putative similar to cysteine endopeptidase precursor CysEP                    |
| AT3G60020 | 6.17        | E3 ubiquitin ligase SCF complex subunit SKP1/ASK1 (At5)                                            |
| AT3G22700 | 5.76        | F-box family protein contains Pfam:PF00646 F-box domain                                            |
| AT2G17690 | 6.86        | F-box family protein contains F-box domain Pfam:PF00646                                            |
| AT3G17400 | 6.95        | F-box family protein                                                                               |
| AT3G60010 | 6.13        | E3 ubiquitin ligase SCF complex subunit SKP1/ASK1 (At13),                                          |

**Other**

|           |       |                                                                                                           |
|-----------|-------|-----------------------------------------------------------------------------------------------------------|
| AT1G63950 | 6.14  | heavy metal associated domain-containing protein                                                          |
| AT5G09980 | 5.11  | PROPEP4, innate immunity                                                                                  |
| AT1G71770 | 5.89  | polyadenylate-binding protein 5 (PABP5)                                                                   |
| AT3G19350 | 23.90 | polyadenylate-binding protein-related (PABP-related)                                                      |
| AT2G18720 | 5.65  | eukaryotic translation initiation factor 2 subunit 3, putative / eIF2S3, putative / eIF-2-gamma, putative |
| AT4G23600 | 18.40 | coronatine-responsive tyrosine aminotransferase. Wounding response                                        |
| AT1G24520 | 5.41  | BCP1, active in diploid tapetum and haploid microspores, required for pollen fertility                    |
| AT3G28570 | 9.55  | AAA-type ATPase family protein                                                                            |
| AT5G15250 | 33.7  | AtFtsH6, degrades light-harvesting complex II during high-light acclimation and senescence                |
| AT5G54190 | 5.46  | protochlorophyllide reductase A (PORA)                                                                    |
| AT5G53680 | 5.93  | RNA recognition motif (RRM)-containing protein                                                            |
| AT3G03240 | 5.00  | esterase/lipase/thioesterase family protein                                                               |
| AT2G18260 | 7.34  | Syntaxin 111, KNOLLE-related protein                                                                      |
| AT1G53080 | 6.20  | legume lectin family protein                                                                              |
| AT2G28490 | 6.10  | cupin family protein similar to preproMP27-MP32 [Cucurbita]                                               |
| AT3G43880 | 6.05  | hypothetical protein p97 homologous protein, <i>Canis familiaris</i> ,                                    |
| AT4G09500 | 5.41  | glycosyltransferase family protein                                                                        |
| AT2G37770 | 7.98  | aldo/keto reductase family protein similar to chalcone reductase                                          |
| AT4G17470 | 5.53  | palmitoyl protein thioesterase                                                                            |
| AT4G18900 | 9.34  | transducin family protein, 5 WD-40 repeats                                                                |
| AT4G22390 | 5.33  | F-box family protein-related                                                                              |

**Other (continued)**

| Gene name | Fold change | Functional or molecular role                                                                                             |
|-----------|-------------|--------------------------------------------------------------------------------------------------------------------------|
| AT5G41830 | 5.46        | F-box family protein-related contains a novel domain similar to F-box that is shared among other Arabidopsis proteins    |
| AT4G14365 | 5.21        | zinc finger (C3HC4-type RING finger) family protein / ankyrin repeat family protein                                      |
| AT1G19610 | 8.44        | plant defensin-fusion protein, putative (PDF1.4) plant defensin protein family member                                    |
| AT1G65150 | 5.45        | meprin and TRAF homology domain-containing protein                                                                       |
| AT5G40000 | 12.37       | AAA-type ATPase family protein BCS1 nuclear gene encoding mitochondrial protein                                          |
| AT1G72660 | 8.71        | developmentally regulated GTP-binding protein, strong similarity to developmentally regulated GTP binding protein (DRG1) |
| AT3G28580 | 7.14        | AAA-type ATPase family protein                                                                                           |
| AT1G30660 | 5.40        | toprim domain-containing protein                                                                                         |

**Unknown**

|           |       |                                                   |
|-----------|-------|---------------------------------------------------|
| AT1G68350 | 7.32  | expressed protein                                 |
| AT2G40680 | 6.12  | expressed protein                                 |
| AT2G28570 | 5.47  | expressed protein                                 |
| AT3G62990 | 6.40  | expressed protein                                 |
| AT4G05370 | 5.57  | hypothetical protein                              |
| AT4G01985 | 5.00  | expressed protein                                 |
| AT1G20070 | 5.09  | expressed protein                                 |
| AT1G24380 | 16.12 | hypothetical protein                              |
| AT1G48720 | 24.03 | hypothetical protein                              |
| AT1G59920 | 7.59  | hypothetical protein                              |
| AT1G61255 | 6.34  | expressed protein                                 |
| AT1G65090 | 7.94  | expressed protein                                 |
| AT1G66060 | 9.49  | hypothetical protein of unknown function (DUF577) |
| AT1G70440 | 8.92  | hypothetical protein                              |
| AT1G53480 | 6.21  | expressed protein                                 |
| AT2G04600 | 5.41  | hypothetical protein                              |
| AT2G23110 | 9.50  | expressed protein                                 |
| AT2G45840 | 14.57 | expressed protein                                 |
| AT3G10750 | 7.07  | hypothetical protein                              |
| AT3G13130 | 6.17  | hypothetical protein                              |
| AT3G13229 | 4.60  | hypothetical protein                              |
| AT3G15310 | 14.45 | expressed protein                                 |
| AT3G29790 | 6.84  | hypothetical protein                              |
| AT3G42725 | 5.89  | expressed protein                                 |
| AT3G61090 | 7.02  | expressed protein of unknown function, DUF537     |
| AT4G13680 | 7.00  | hypothetical protein of unknown function (DUF295) |
| AT4G16460 | 6.83  | hypothetical protein                              |

---

**Unknown (continued)**

---

| Gene name | Fold change | Functional or molecular role                |
|-----------|-------------|---------------------------------------------|
| AT5G05220 | 7.44        | expressed protein                           |
| AT5G07330 | 14.26       | expressed protein                           |
| AT5G40800 | 10.23       | hypothetical protein                        |
| AT5G53710 | 12.39       | expressed protein                           |
| AT5G60350 | 5.22        | hypothetical protein                        |
| AT5G63350 | 8.89        | expressed protein                           |
| AT5G66780 | 6.89        | expressed protein                           |
| AT3G56220 | 5.06        | expressed protein                           |
| AT1G19530 | 5.54        | expressed protein, N-terminal myristoylated |
| AT5G02210 | 5.69        | expressed protein, N-terminal myristoylated |
