# Supplementary material
Source: PubMed Central journal article supplement (PMC1913740)
Supplement: plntcell_tpc.106.047621_6.pdf [file plntcell_tpc.106.047621_6.pdf]

## Supplemental Table 2. Genes with at least a 5-fold reduced RNA level in *tdt-1* mutants

Entries shown in bold were verified by real-time RT-PCR. Relative expression levels determined by this method are shown in parenthesis.

### Metabolism, Biosynthesis, Catabolism

| Gene name        | Fold change              | Functional or molecular role                                   |
|------------------|--------------------------|----------------------------------------------------------------|
| AT4G33790        | -9.24                    | acyl CoA reductase, male sterile 2                             |
| AT2G32860        | -8.46                    | glycosyl hydrolase family protein , carbohydrate metabolism    |
| AT3G21560        | -5.03                    | UDP-glucosyltransferase                                        |
| AT5G14200        | -7.81                    | AtIMD1, 3-isopropylmalate dehydrogenase, leucine biosynthesis  |
| AT5G25980        | -5.27                    | glycosyl hydrolase family 1 protein                            |
| AT3G19710        | -21.75                   | BCAT4, branched-chain amino acid aminotransferase              |
| AT3g62040        | -6.29                    | haloacid dehalogenase-like hydrolase family protein            |
| AT5G23020        | -17.16                   | 2-isopropylmalate synthase 2 (IMS2) glucosinolate biosynthesis |
| <b>AT5G23010</b> | -11.18<br><b>(-61.3)</b> | 2-isopropylmalate synthase 3 (IMS3) glucosinolate biosynthesis |
| AT3G02020        | -10.97                   | aspartate kinase, aspartate biosynthesis                       |
| AT1G06360        | -5.79                    | fatty acid desaturase family protein                           |

### Signaling and Responses

|           |        |                                                                                                                             |
|-----------|--------|-----------------------------------------------------------------------------------------------------------------------------|
| AT1G05700 | -9.18  | leucine-rich repeat protein kinase                                                                                          |
| AT1G74670 | -11.94 | gibberellin-responsive protein                                                                                              |
| AT3G03190 | -6.56  | AtGSF11, glutathione S-transferase, response to oxidative stress, toxin catabolism                                          |
| AT5G64110 | -5.19  | peroxidase, similar to peroxidase ATP3a, response to oxidative stress                                                       |
| AT5G20970 | -5.07  | heat shock family protein contains similarity to 18.0 kDa class I heat shock protein, response to heat shock                |
| AT5G55250 | -7.11  | IAMT1, S-adenosyl-L-methionine:carboxyl methyltransferase family protein, converts IAA to its methyl ester, auxin signaling |

### Transcription

|           |       |                                                             |
|-----------|-------|-------------------------------------------------------------|
| AT1G71692 | -5.80 | AGL12, MADS-box transcription factor                        |
| AT1G68880 | -7.31 | bZIP transcription factor family protein                    |
| AT2G28160 | -5.46 | FIT1. Transcription factor, regulates Fe uptake in the root |

**Transport**

| Gene name        | Fold change              | Functional or molecular role                                                                                          |
|------------------|--------------------------|-----------------------------------------------------------------------------------------------------------------------|
| AT5G45105        | -30.70                   | similar to putative metal transporter ZIP8, Cation transport                                                          |
| <b>AT1G01580</b> | -28.26<br><b>(-81.1)</b> | FRO2, low-iron-inducible ferric chelate reductase responsible for reduction of iron at the root surface for transport |
| AT1G32450        | -5.83                    | proton-dependent oligopeptide transport (POT) family protein                                                          |
| <b>AT4G19690</b> | -16.08<br><b>(-94.7)</b> | IRT1, iron-responsive transporter                                                                                     |
| AT4G12030        | -7.93                    | bile acid:sodium symporter family protein, Na transport                                                               |
| AT5G23980        | -5.54                    | ferric-chelate reductase (FRO4)                                                                                       |
| AT3G58810        | -6.95                    | AtMTPA2, zinc transporter                                                                                             |
| AT5G63850        | -7.88                    | AAP4, amino acid transporter 4, downregulated by dehydration                                                          |
| AT5G09220        | -7.73                    | AAP2, amino acid permease 2                                                                                           |

**Electron Transport**

|           |        |                                         |
|-----------|--------|-----------------------------------------|
| AT1G06830 | -13.17 | glutaredoxin family protein             |
| AT1G13710 | -8.22  | cytochrome P450 family protein, CYP78A5 |

**Other**

|           |       |                                                                                                                          |
|-----------|-------|--------------------------------------------------------------------------------------------------------------------------|
| AT1G70850 | -7.73 | Bet v I allergen family protein similar to Csf-2 [ <i>Cucumis sativus</i> ], Pathogenesis-related protein Bet v I family |
| AT2G40330 | -5.74 | Bet v I allergen family protein                                                                                          |
| AT3G54600 | -6.60 | DJ-1 family protein, similarity to protease I from <i>Pyrococcus furiosus</i>                                            |
| AT2G32100 | -6.60 | ovate protein-related contains uncharacterized plant-specific domain TIGR01568                                           |
| AT2G33790 | -5.56 | pollen Ole e 1 allergen and extensin family protein                                                                      |
| AT3G18200 | -5.82 | nodulin MtN21 family protein similar to MtN21 involved in root nodule development, <i>Medicago truncatula</i>            |
| AT1G67870 | -5.59 | glycine-rich protein                                                                                                     |
| AT4G29030 | -8.69 | glycine-rich protein                                                                                                     |
| AT2G17880 | -5.30 | DNAJ heat shock protein                                                                                                  |
| AT4G00780 | -7.01 | meprin and TRAF homology domain and MATH domain-containing protein                                                       |
| AT5G02780 | -5.72 | In2-1 protein, putative similar to In2-1 [ <i>Zea mays</i> ]                                                             |
| AT4G12545 | -7.96 | protease inhibitor/seed storage/lipid transfer protein (LTP) family                                                      |
| AT2G40610 | -6.12 | ATEXPA8 , expansin 8, cell-wall-loosening                                                                                |
| AT4G12550 | -5.51 | AIR1, auxin induced lipid transfer protein                                                                               |
| AT5G45070 | -9.49 | TIR domain disease resistance protein                                                                                    |

---

**Unknown**

---

| Gene name        | Fold change                     | Functional or molecular role |
|------------------|---------------------------------|------------------------------|
| AT3G54500        | -5.78                           | expressed protein            |
| AT5G19120        | -5.75                           | expressed protein            |
| AT2G28780        | -13.09                          | expressed protein            |
| AT3G06070        | -5.74                           | expressed protein            |
| <b>AT3G16670</b> | -34.03<br><b>(undetectable)</b> | expressed protein            |
| AT2G20670        | -5.64                           | expressed protein            |

---
