# Supplementary material
Source: PubMed Central journal article supplement (PMC1913740)
Supplement: plntcell_tpc.106.047621_7.pdf [file plntcell_tpc.106.047621_7.pdf]

### Supplemental Table 3. Oligonucleotide Sequences:

|                              |                                                                               |
|------------------------------|-------------------------------------------------------------------------------|
| <b>ACT2 (AT3G18780)</b>      | 5'-TCCCTCAGCACATTCCTGCAGAT-3',<br>5'-AACGATTCCTGGACCTGCCTCATC-3'              |
| <b>LEC1 (At1g21970)</b>      | 5'-ATCCATCTCTGAATTGAACTTGGA-3' (exon1/exon2),<br>5'-GGCATGTATTGGTCTTGCTCA-3'  |
| <b>Lea (At1g52690)</b>       | 5'-GAGGCAAGGCTCAGGAGAA-3' (exon1/exon2),<br>5'-GCAGCTTGAGACGTCTTGTCTT-3'      |
| <b>Lea (At5g06760)</b>       | 5'-GAGGAAAAGGCGGAGAAGAT-3' (exon1/exon2),<br>5'-TTGTCCAGTGGTCGAGTGAGT-3'      |
| <b>Hsp17.4 (At3g46230)</b>   | 5'-ACGTGGCAGCGTTCACAA-3',<br>5'-CTTTACTTCCTCCACCTTTGCAT-3'                    |
| <b>AtHSP90.1 (At5g52640)</b> | 5'-GACGATCAGCTTGAATACTTGGA-3' (exon3,exon4),<br>5'-ACTTCTTCAACCTCACCTTCGTT-3' |
| <b>AtHSP70 (At2g32120)</b>   | 5'-GGTGACAGGAAATGGCAGAA-3' (exon1/exon2),<br>5'-GTGAACTTGAGAACCGTTCCAA-3'     |
| <b>HSP26.5 (At1g52560)</b>   | 5'-TCCCACCCTAAATGAGTTCTT-3' (exon1/exon2),<br>5'-GAACCTCGTATCTGAGCTTGTA-3'    |
| <b>HSP23.5-M (At5g51440)</b> | 5'-CTTCTCACATATACTCGATCCGTTT-3' (exon1/exon2),<br>5'-TAGATGCAACGCGTCGTCTT-3'  |
| <b>ARF4 (At5g60450)</b>      | 5'-TGTTGGTGCGATGGGATGA-3' (exon8/exon9),<br>5'-GGAGCAGCAGCTGGACTGAA-3'        |
| <b>ARF3 (At2g33860)</b>      | 5'-TGGTAAGGTGGGACGACATT-3' (exon8/exon9),<br>5'-CGGAAGAGGGTGATGATGATA-3'      |
| <b>TAS3 (At3g17185)</b>      | 5'-TCTCCAAGGCATTAAGGAA-3' (exon1/exon2),<br>5'-CAAGGTCAAGAAAAGAGAATAAT-3'     |
| <b>PHB (At2g34710)</b>       | 5'-TCCTAAGCCAAGTTCTCTAAG-3',<br>5'-TGAGCAAGAATCTTCGATG-3'                     |
| <b>PHB –</b>                 | 5'-ACATCAACAGCAAAACCCAAAT-3'<br>5'-GACCAGGCTTCATCCCAATCA-3'                   |
| <b>REV (At5g60690)</b>       | 5'- GAATAGTCCTGCTGGATTGCTCT-3'                                                |

5'- GGATCTCTGCAATCTTCATAGGTT-3'

**AthB15 (At1g52150)** 5'-CCAAATCCTTCACTCCCAGCTA-3'  
5'-CCAGGCTTCATTCCAGGCAT-3'

**PHV (At1g30490)** 5'-GCAAGGCTACAGGAACTGCTGT-3'  
5' - TTGTAGGAGCATAAATCTGAGTGTT-3'

**AthB8 (At4g32880)** 5'-GTCCTGCTGGATTATTGTCCATT-3'  
5'-CAAGCACGAGCAGCGATT-3'

**SFC (At5g13300)** 5'-GACTCTCCCATGTTCCGCAA-3',  
5'-CTCGCCTAGTCCTTCAGTGTATTT-3' (exon2/exon3)

**BPS1 (At1g01550)** 5'-CTTCTCTCGTCTTTCCTGG-3'  
5'-CCGCGTTCTTCGAAGATA-3'

**BME3 (At3g54810)** 5'-CCCCACTCCTTACTCCTTTTT-3',  
5'-GTCTCTCTAGCTCTGTTGTTCTTA-3' (exon1/exon2)

**MYB4 (At1g22640)** 5'-TCCCGGCAATAAGCGACCATTTG-3'  
5'-TCACCGAGGAAGAAGACGAACTCA-3'

**REV –** 5'-ATCTGTGGTCACAACCTCC-3'  
5'-GTTTGTGAGAGGTCGCTA-3'

**AthB8 –** 5'-GCTACCACAGATACTAGC-3'  
5'-TCGCAAGGTCTAATGAGG-3'

**AthB15 –** 5'-TCAAAGGCAACTGGAACC-3'  
5'-CACCCAAAGTACTTGCAC-3'

The three primers listed above were taken from Li et al. (2005)

**PHV –** 5'-AGACCTTGGCGGAGTTCCTTTG-3'  
5'-GGTATCGTAGCTGTTTCACGCAAC-3'

**DCL1 (At1g01040)** 5'-GATCCATTCCCTAAGCGAAGTTTCAGAG-3'  
5'-CTATGGATCTTTATGTTGCTCGGGC-3'

The two primers listed above were taken from from Vaucheret et al. (2004).

**ARF8 (At5g37020)** – 5'-AGATGTTTGCTATCGAAGGGTGTGTTG-3'  
5'-CTTCTCCTTGGTGATGACCCATGG-3'

**ARF17 (At1g77850)** – 5'-AGCACCTGATCCAAGTCCTTCTATG-3'  
5'-GAAATCCTCCCCAGCTATTCACCA-3'

**AGO1 (At1g48410)** – 5'-AAGGAGGTCGAGGAGGGTATGG-3'  
5'-CCTACTGTTCTGGCTCAGCAATTTG-3'

The three primers listed above were taken from Vazquez et al. (2004).

To genotype *tdt-1*, we amplified genomic DNA using primers that spanned the 50 bp deletion. To genotype *tdt-2*, we used the SALK T-DNA left border-specific oligonucleotide LBB1 and TDT-specific primers listed below:

*tdt-1* (1)                    5': GTGCTATTCTCCTGGTGAATG  
*tdt-1* (2)                    5': CACCTCATTACTTGCTGGCT

*tdt-2* (1)                    5': TCAATCAGAGGAAGCCAAAG  
*tdt-2* (2)                    5': CAGTACTGGACTCGACACTT  
LBB1 5': GCGTGGACCGCTTGCTGCAACT

To genotype *vcs-7*, we used the SALK T-DNA left-border-specific oligonucleotide LBB1, and VCS-specific primers listed below:

5': GCGACTAACTTGCATCCTCAG  
5': CGCAGTACATGTTTACCAATTG  
LBB1 5': GCGTGGACCGCTTGCTGCAACT

## RACE

5' RACE Adapter  
(5'-CUGAUGGCGAUGAAUGAACACUGCGUUUGCUGGCUUUGAUGAA-3')

5' RACE Outer Primer        5'-GCTGATGGCGATGAATGAACACTG-3'

At5g51440 (HSP23.5-M) gene specific primer  
5'-GCATCTGGCTCAAGCTTCTCGTTGGAGTAA-3'

At3g46230 (HSP17.4) gene specific primer  
5'-CTCACTGCTCCTCTCACCGCTTATCTGAA-3'
